# Supplementary figures and images for: Nanoscale organization of rotavirus replication machineries
Source: eLife journal article supplement (doi:10.7554/elife.42906), 2019-07-25

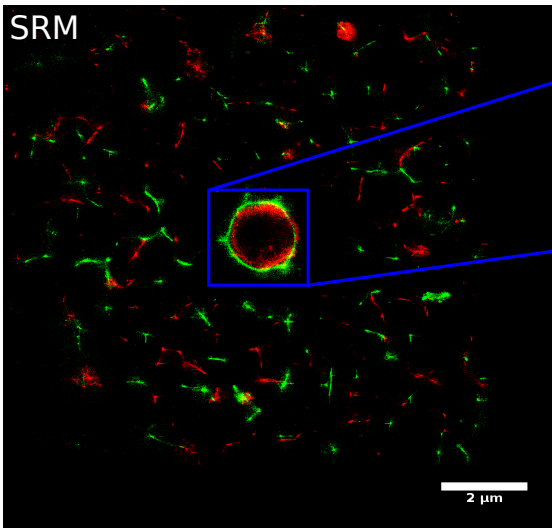

## Pre-Segmentation

Step 1

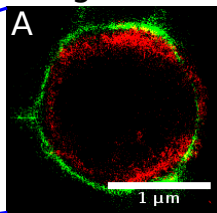

Step 2

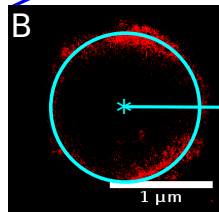

NSP2

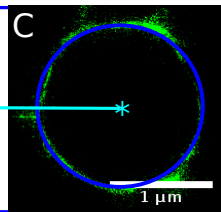

VP6

Step 3

DLSFC

Supplement: supp [file elife-42906-supp-v1.zip]

# Experimental data vs. Modelling

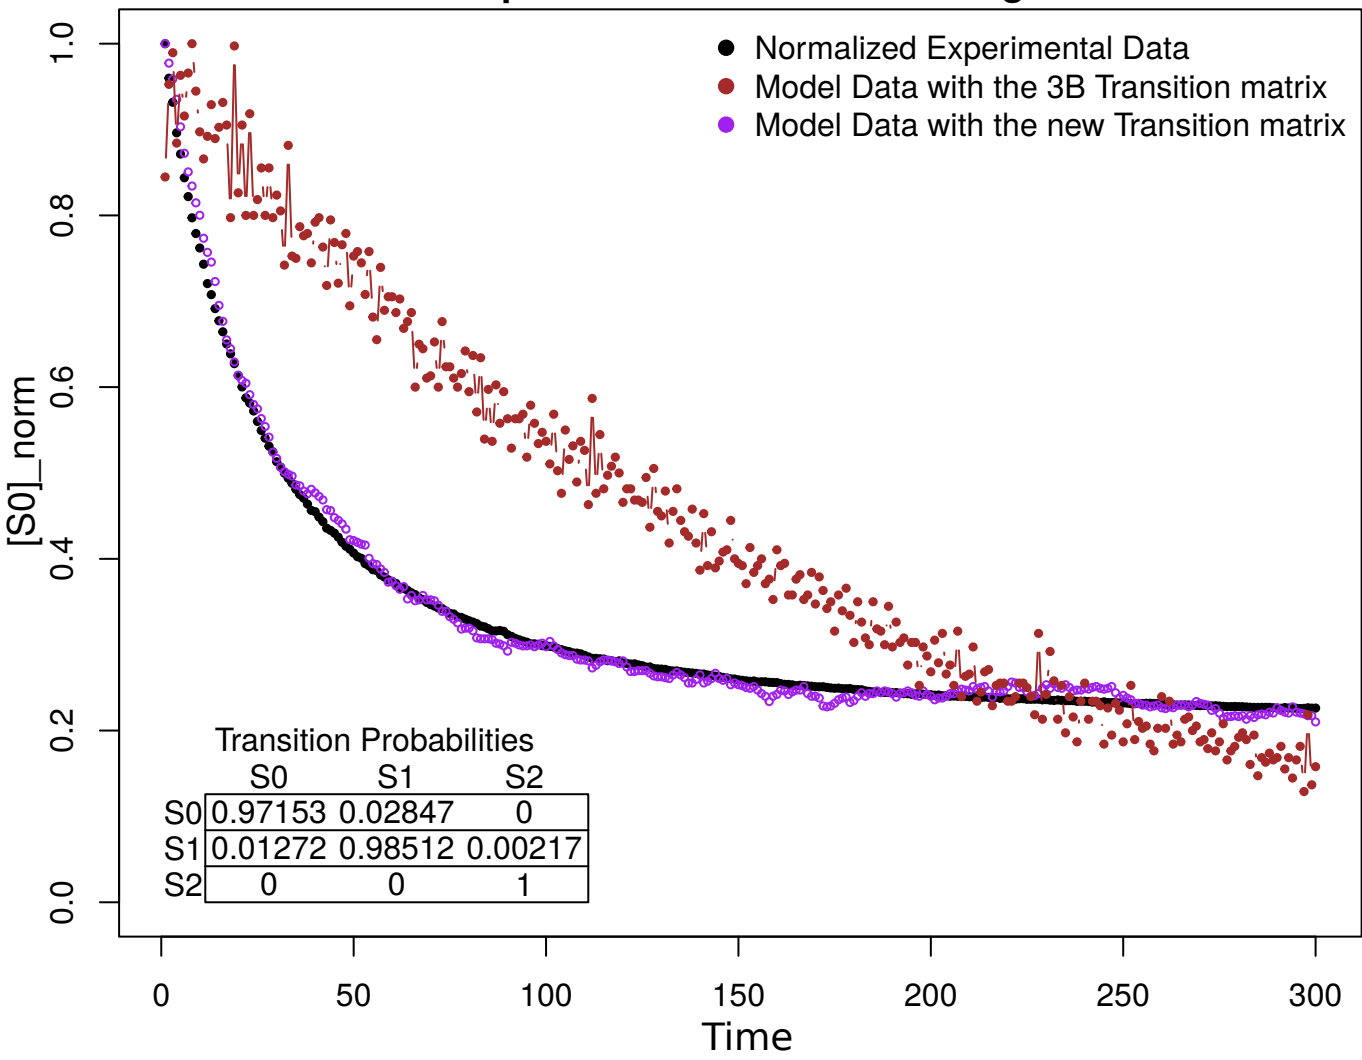

Supplement: supp [file elife-42906-supp-v1.zip]

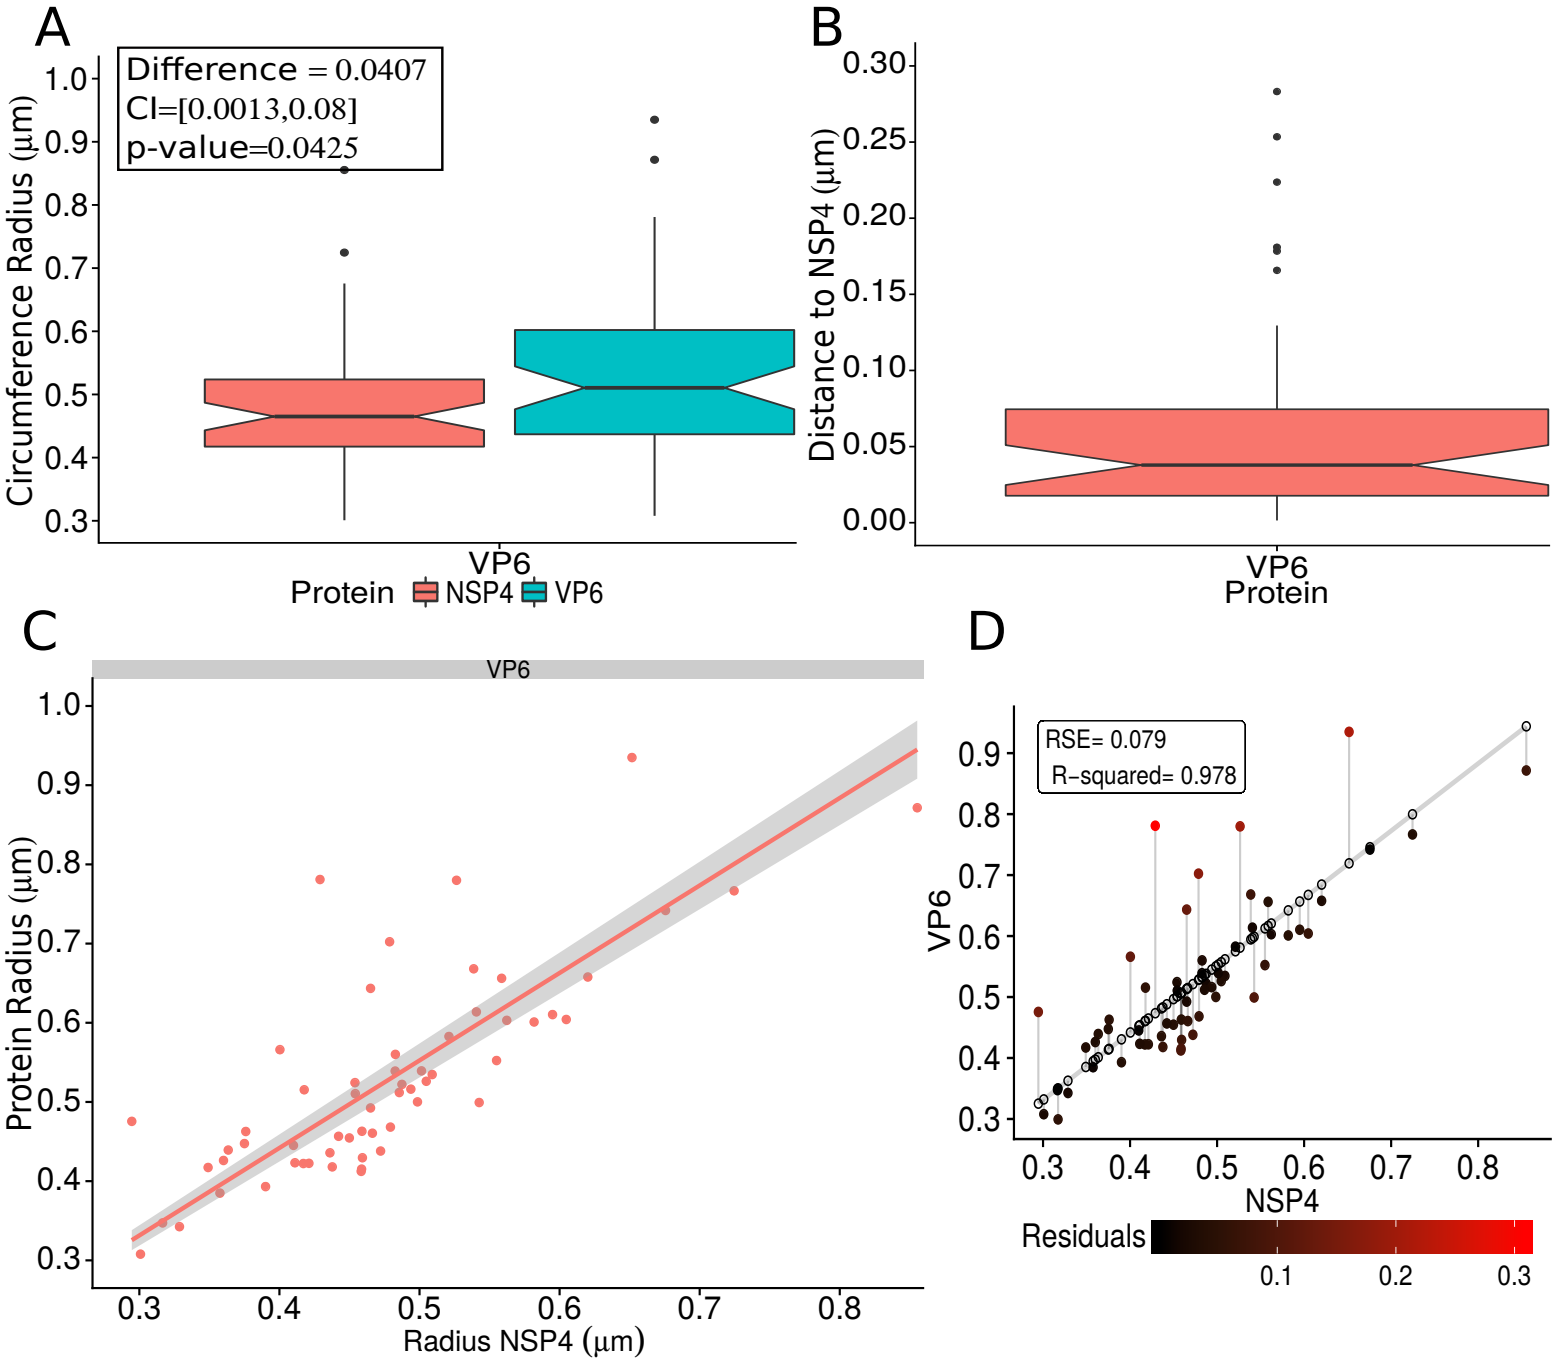

Supplement: supp [file elife-42906-supp-v1.zip]

A

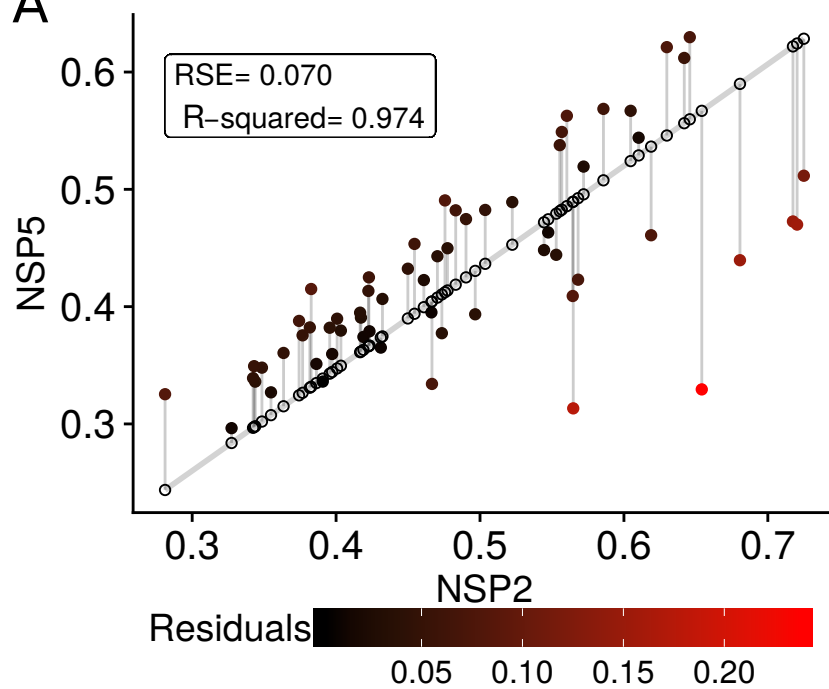

B

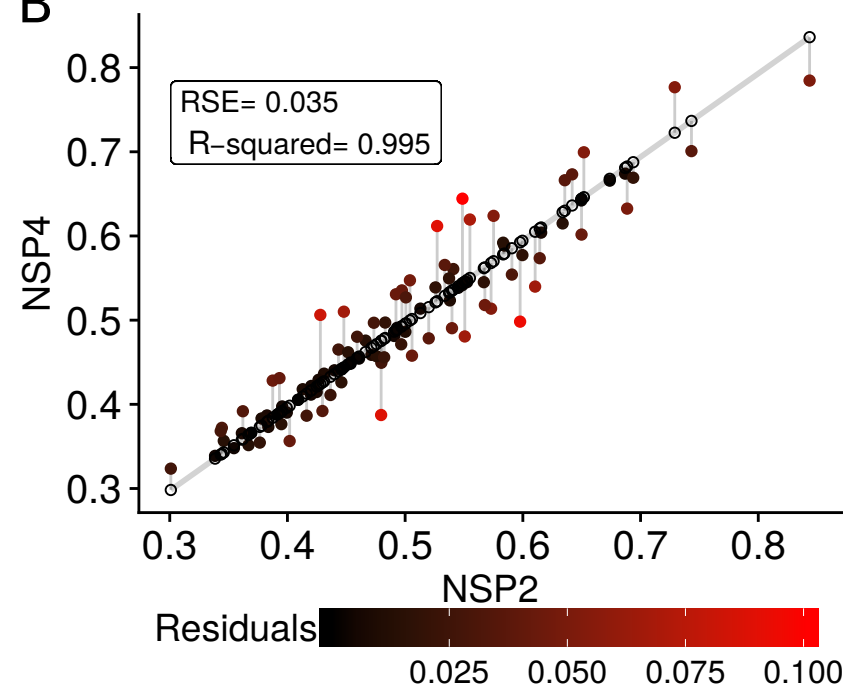

C

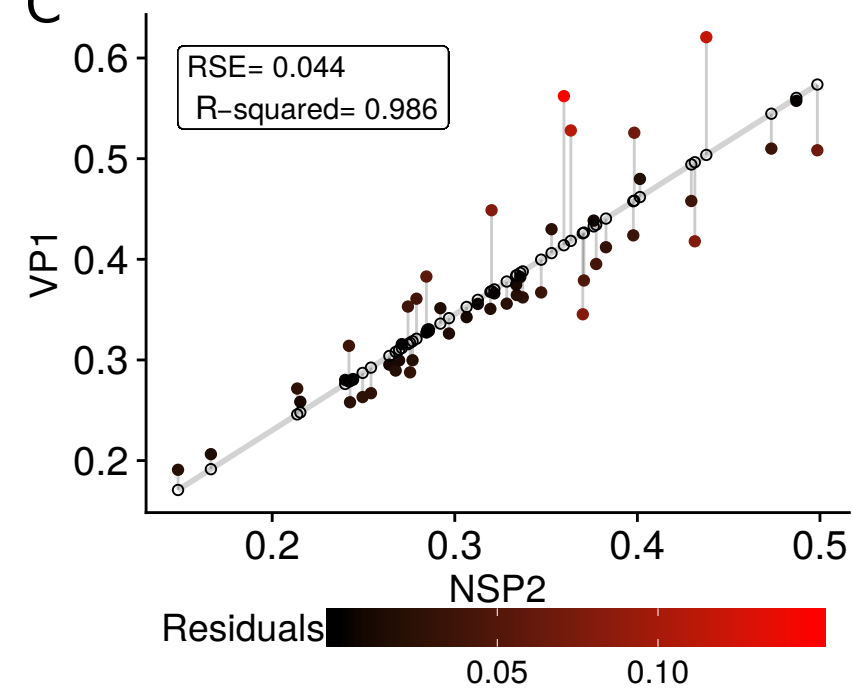

D

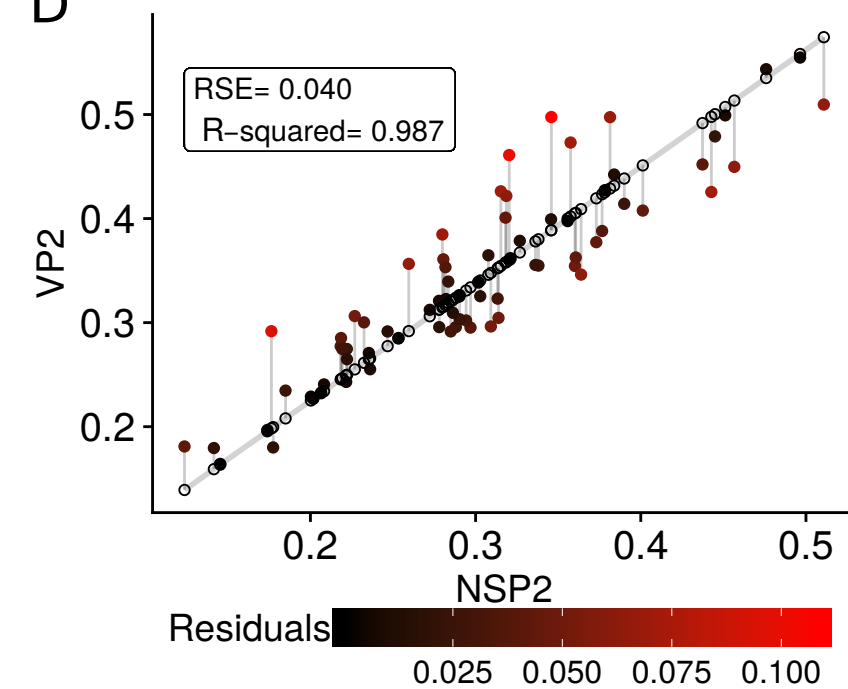

E

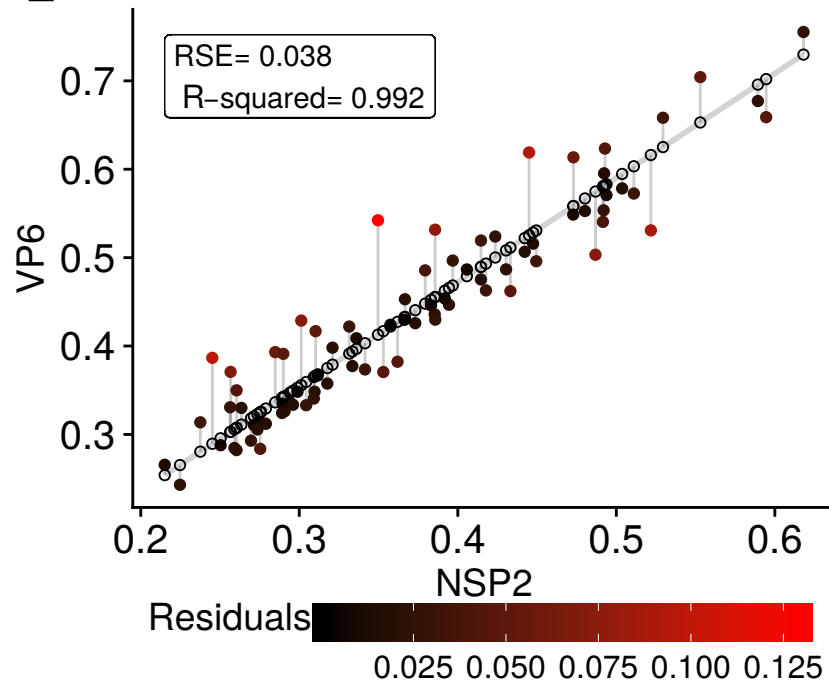

F

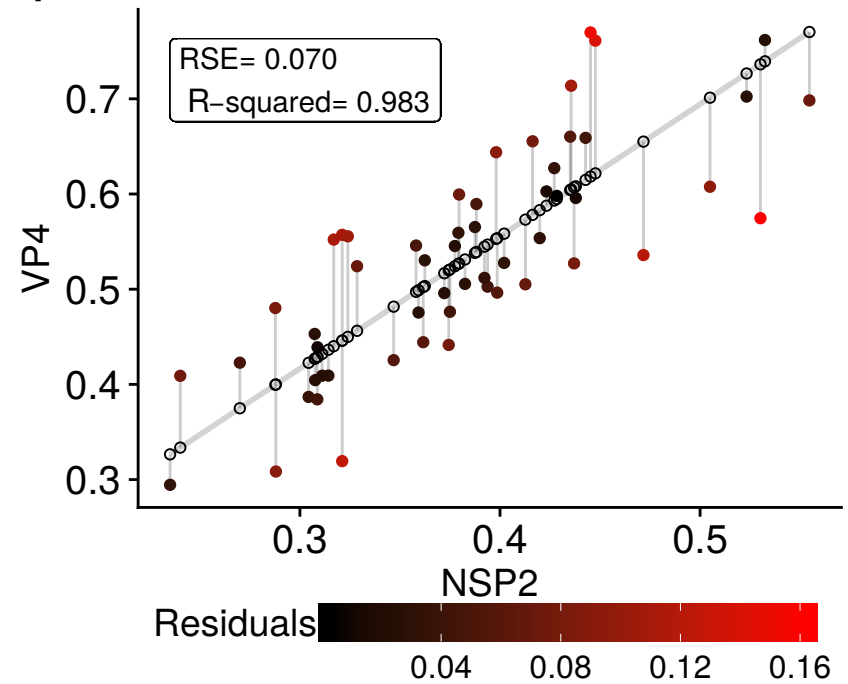

G

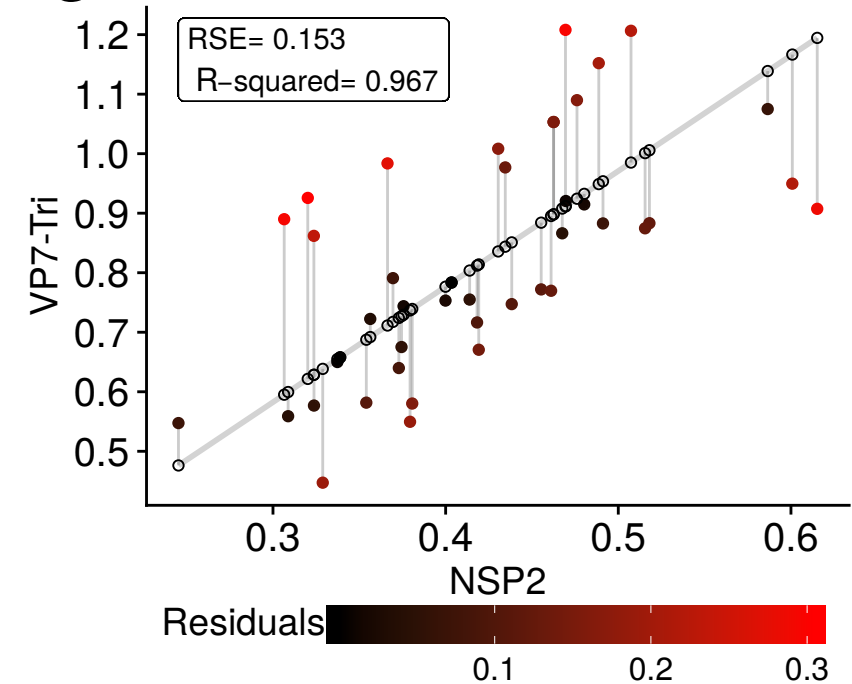

H

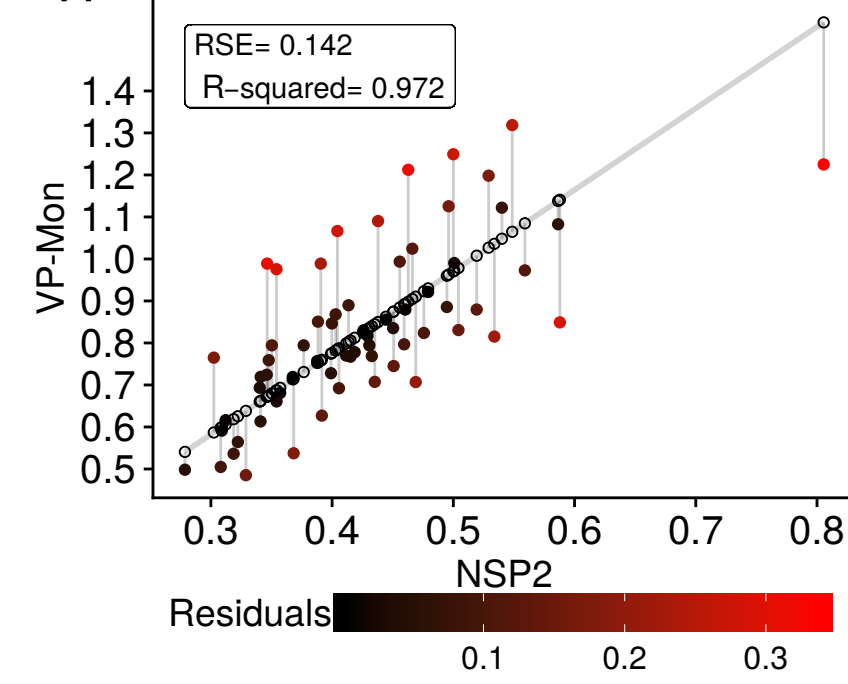

Supplement: supp [file elife-42906-supp-v1.zip]

NSP2-NSP5

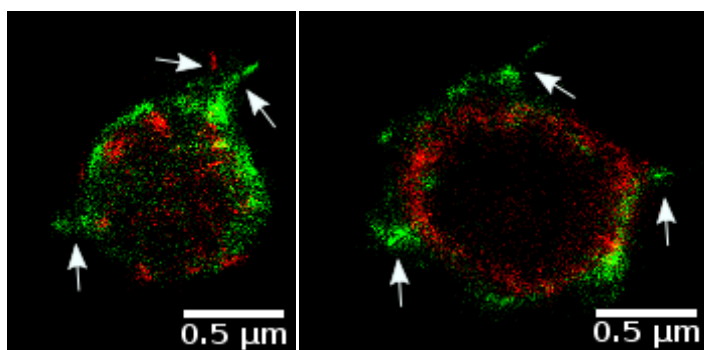

NSP2-NSP4

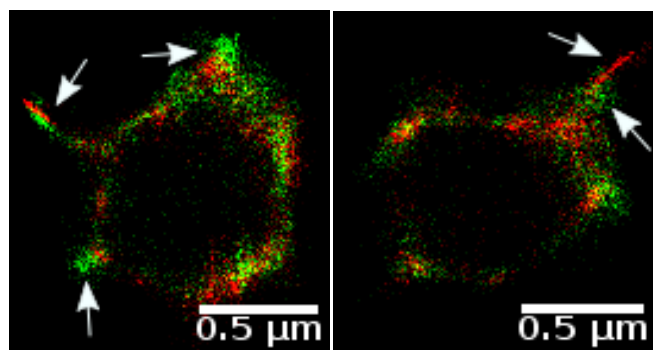

NSP2-VP6

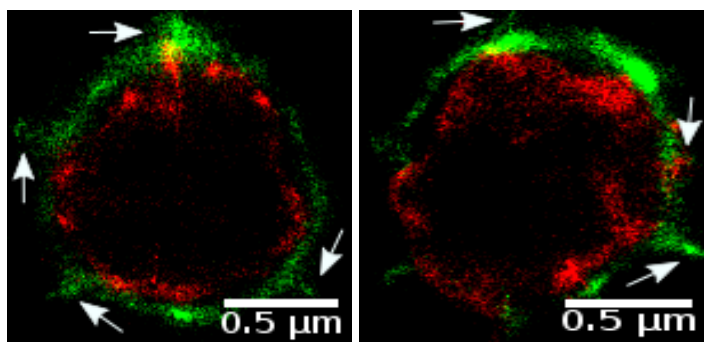

NSP2-VP4

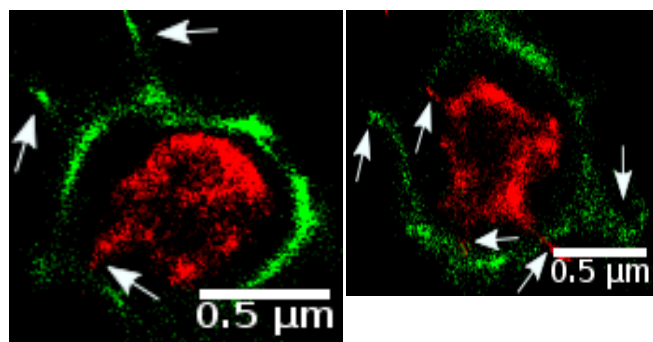

NSP2-VP7-Mon

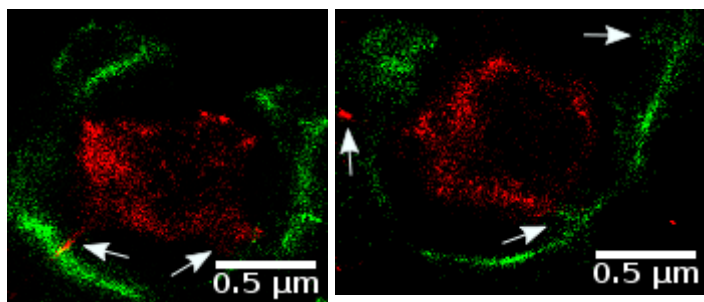

NSP2-VP7-Tri

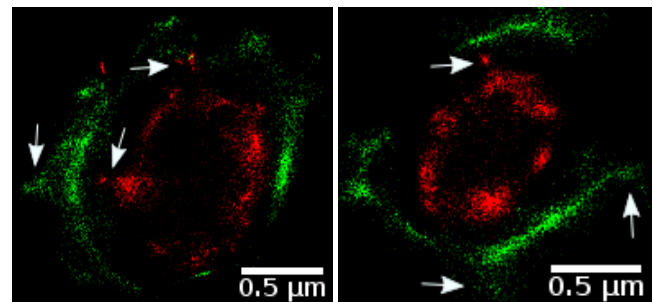

Supplement: supp [file elife-42906-supp-v1.zip]

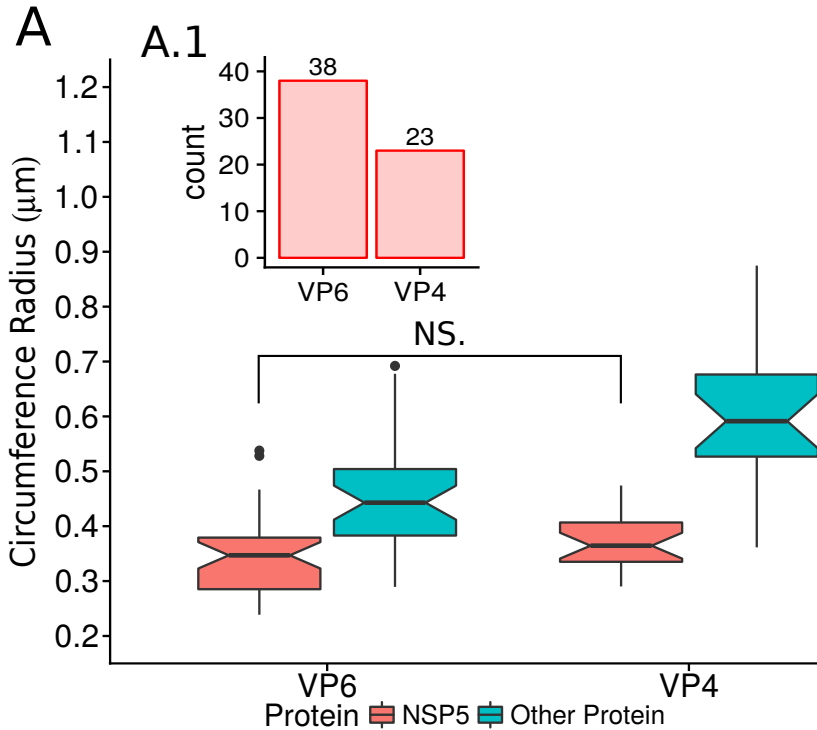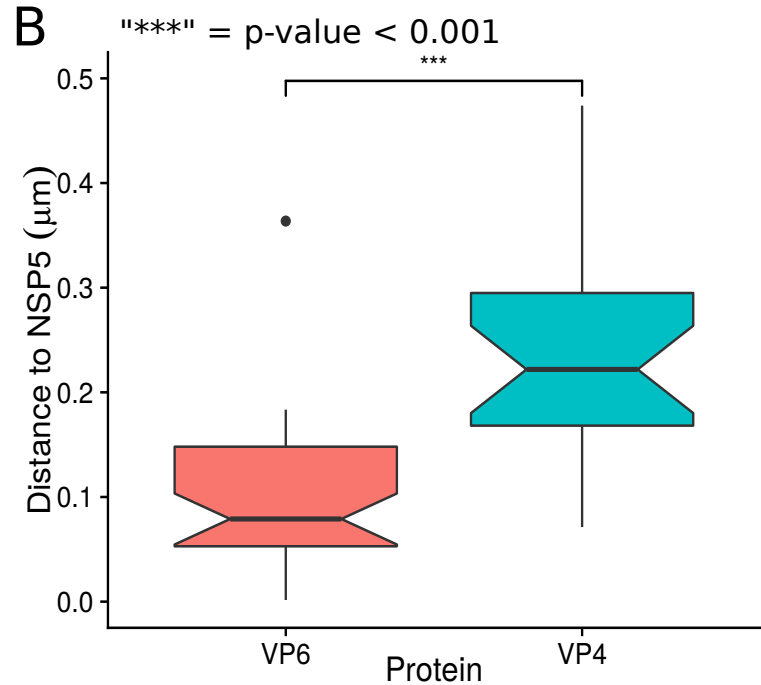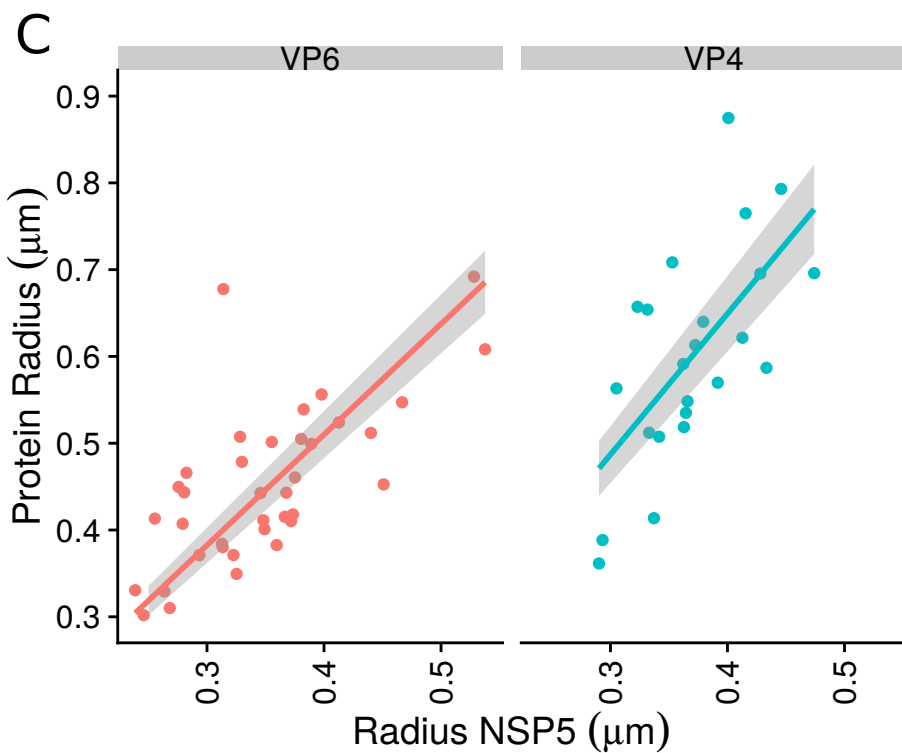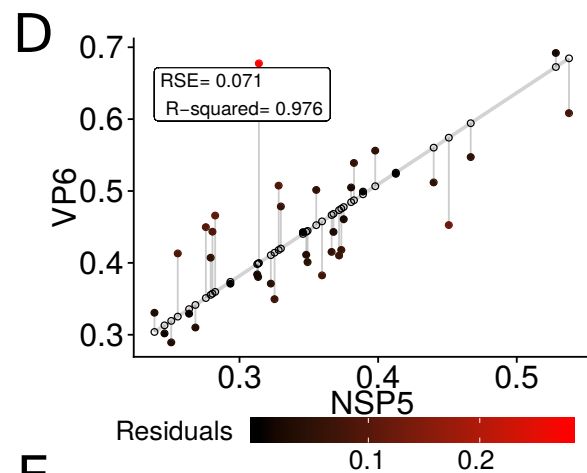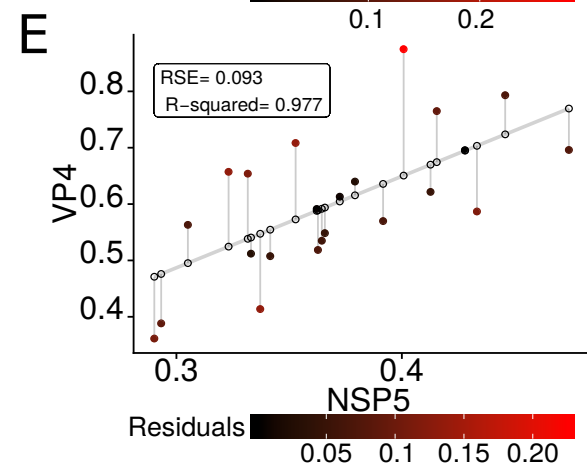

Supplement: supp [file elife-42906-supp-v1.zip]

# A) 1 fluorophore

A.1)

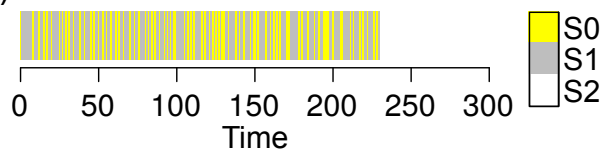

A.2)

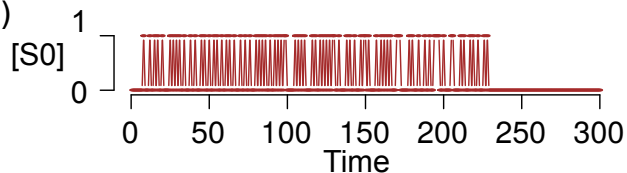

# B) 10 fluorophores

B.1)

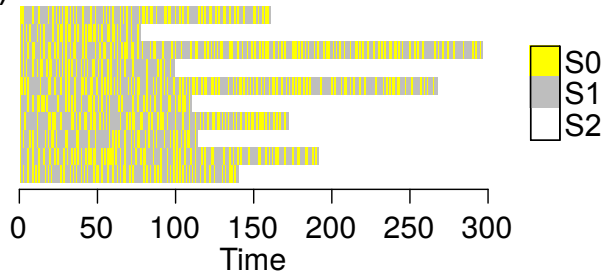

B.2)

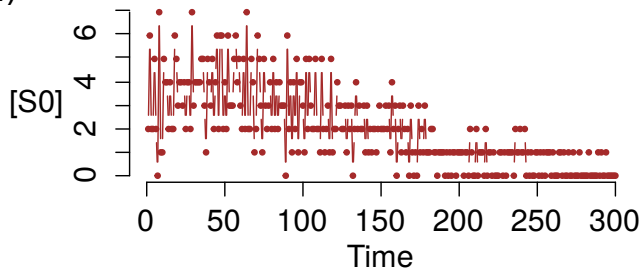

# C) 1000 fluorophore

C.1)

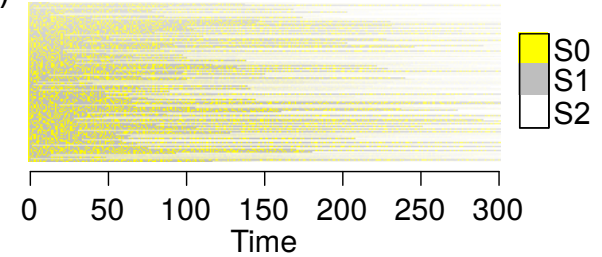

C.2)

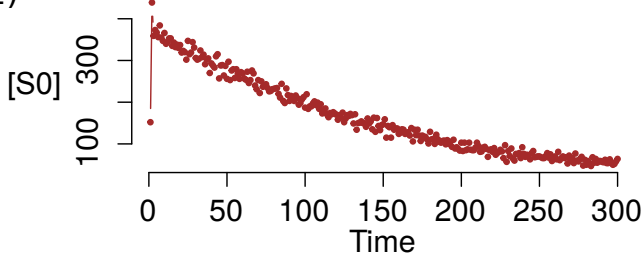

Supplement: supp [file elife-42906-supp-v1.zip]

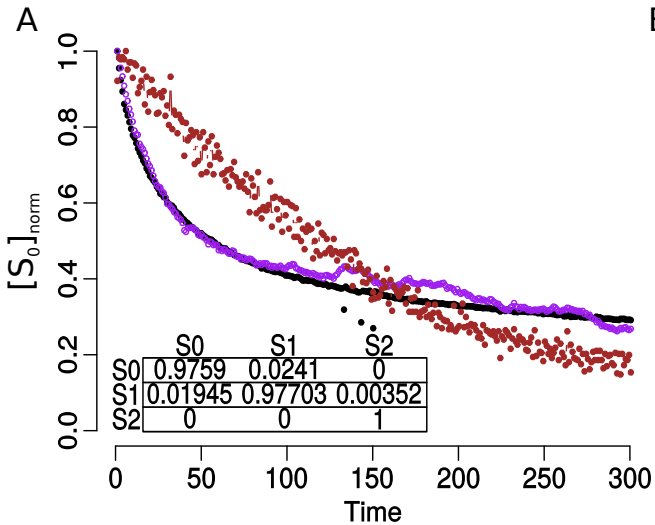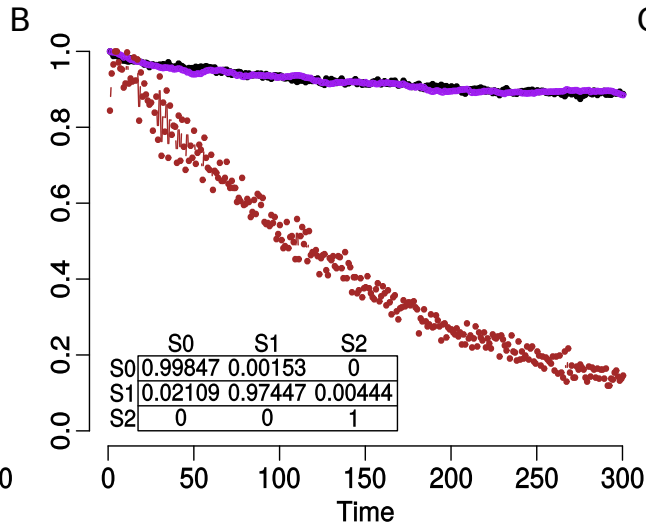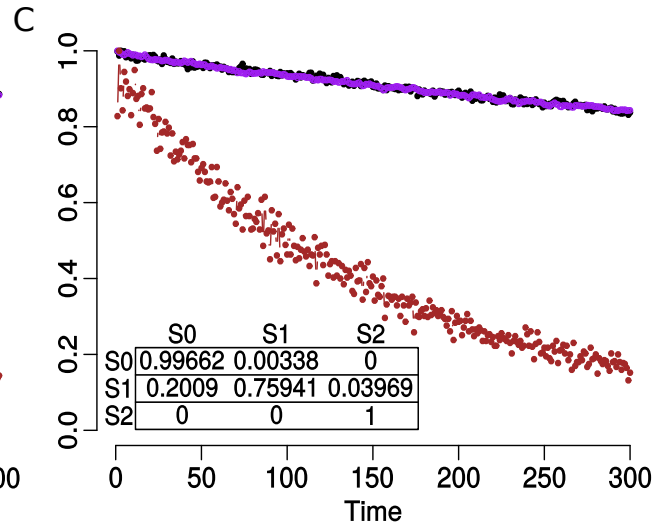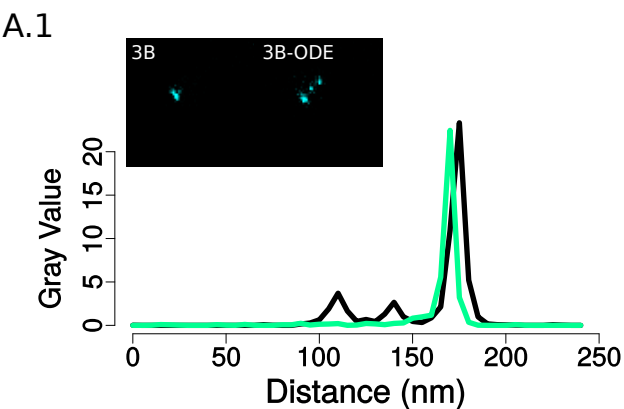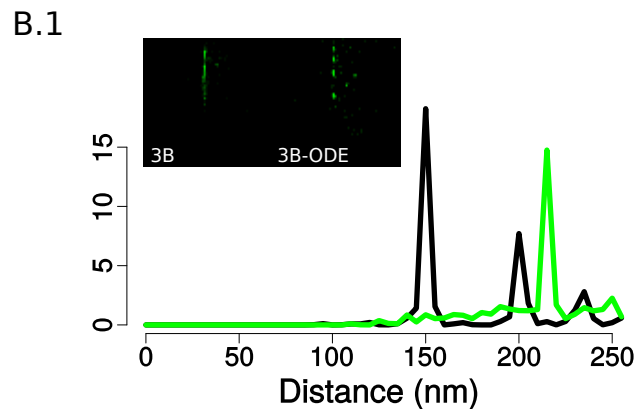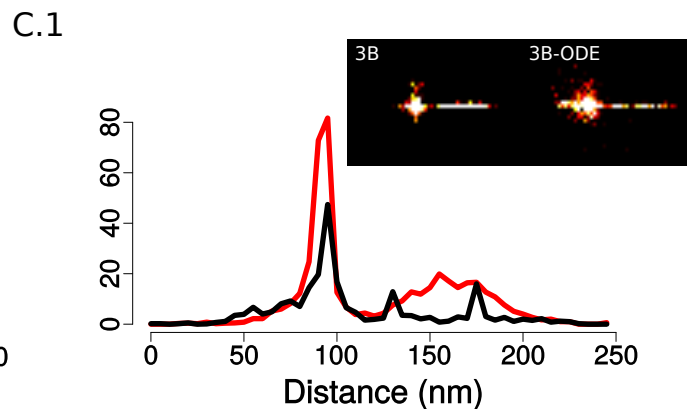

● Normalized experimental data    ● Model data (proposed)    ● Model data (canonical form)

Supplement: supp [file elife-42906-supp-v1.zip]

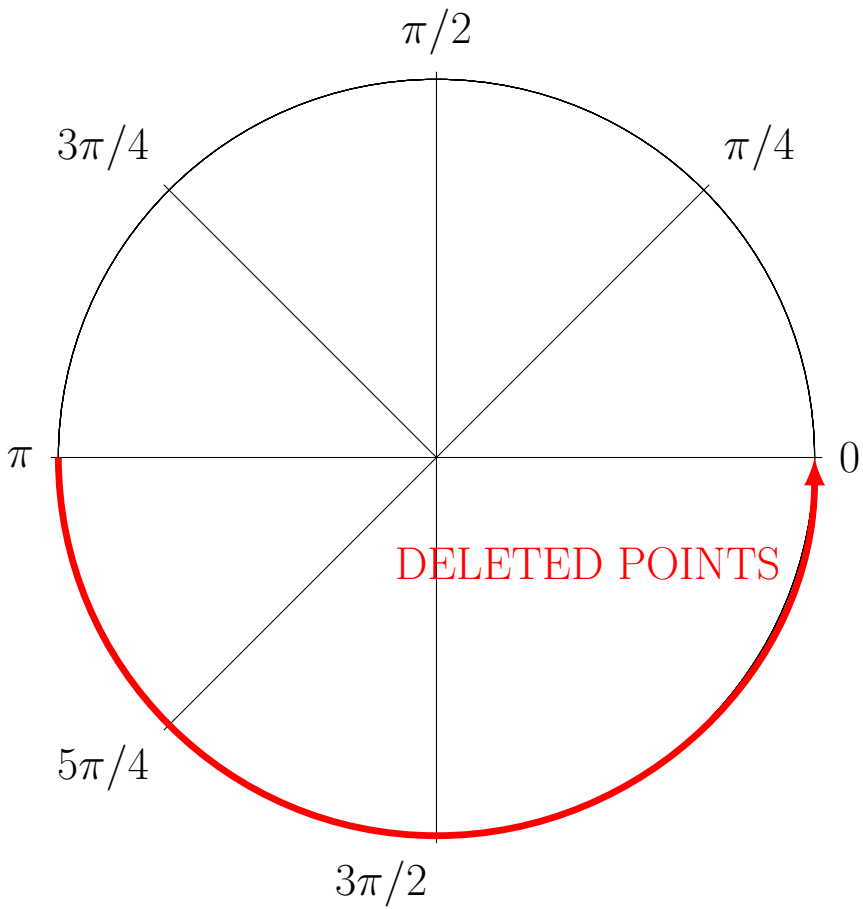

Supplement: supp [file elife-42906-supp-v1.zip]

A

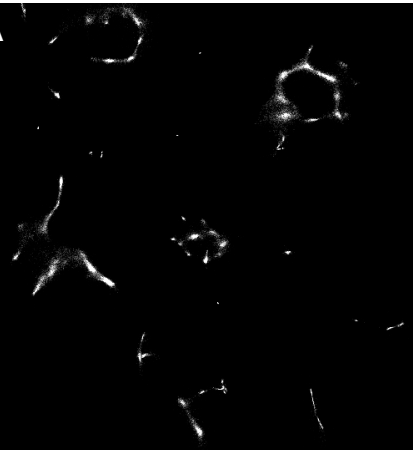

B

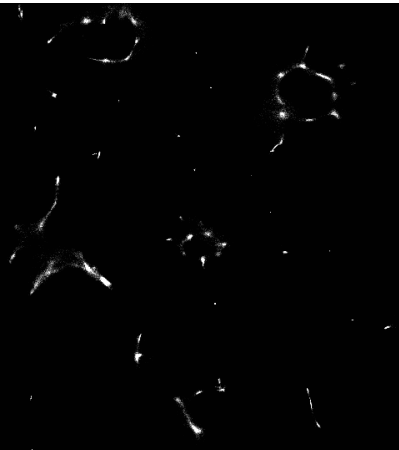

C

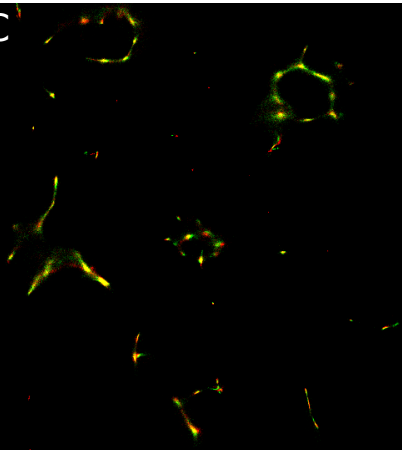

Supplement: supp [file elife-42906-supp-v1.zip]

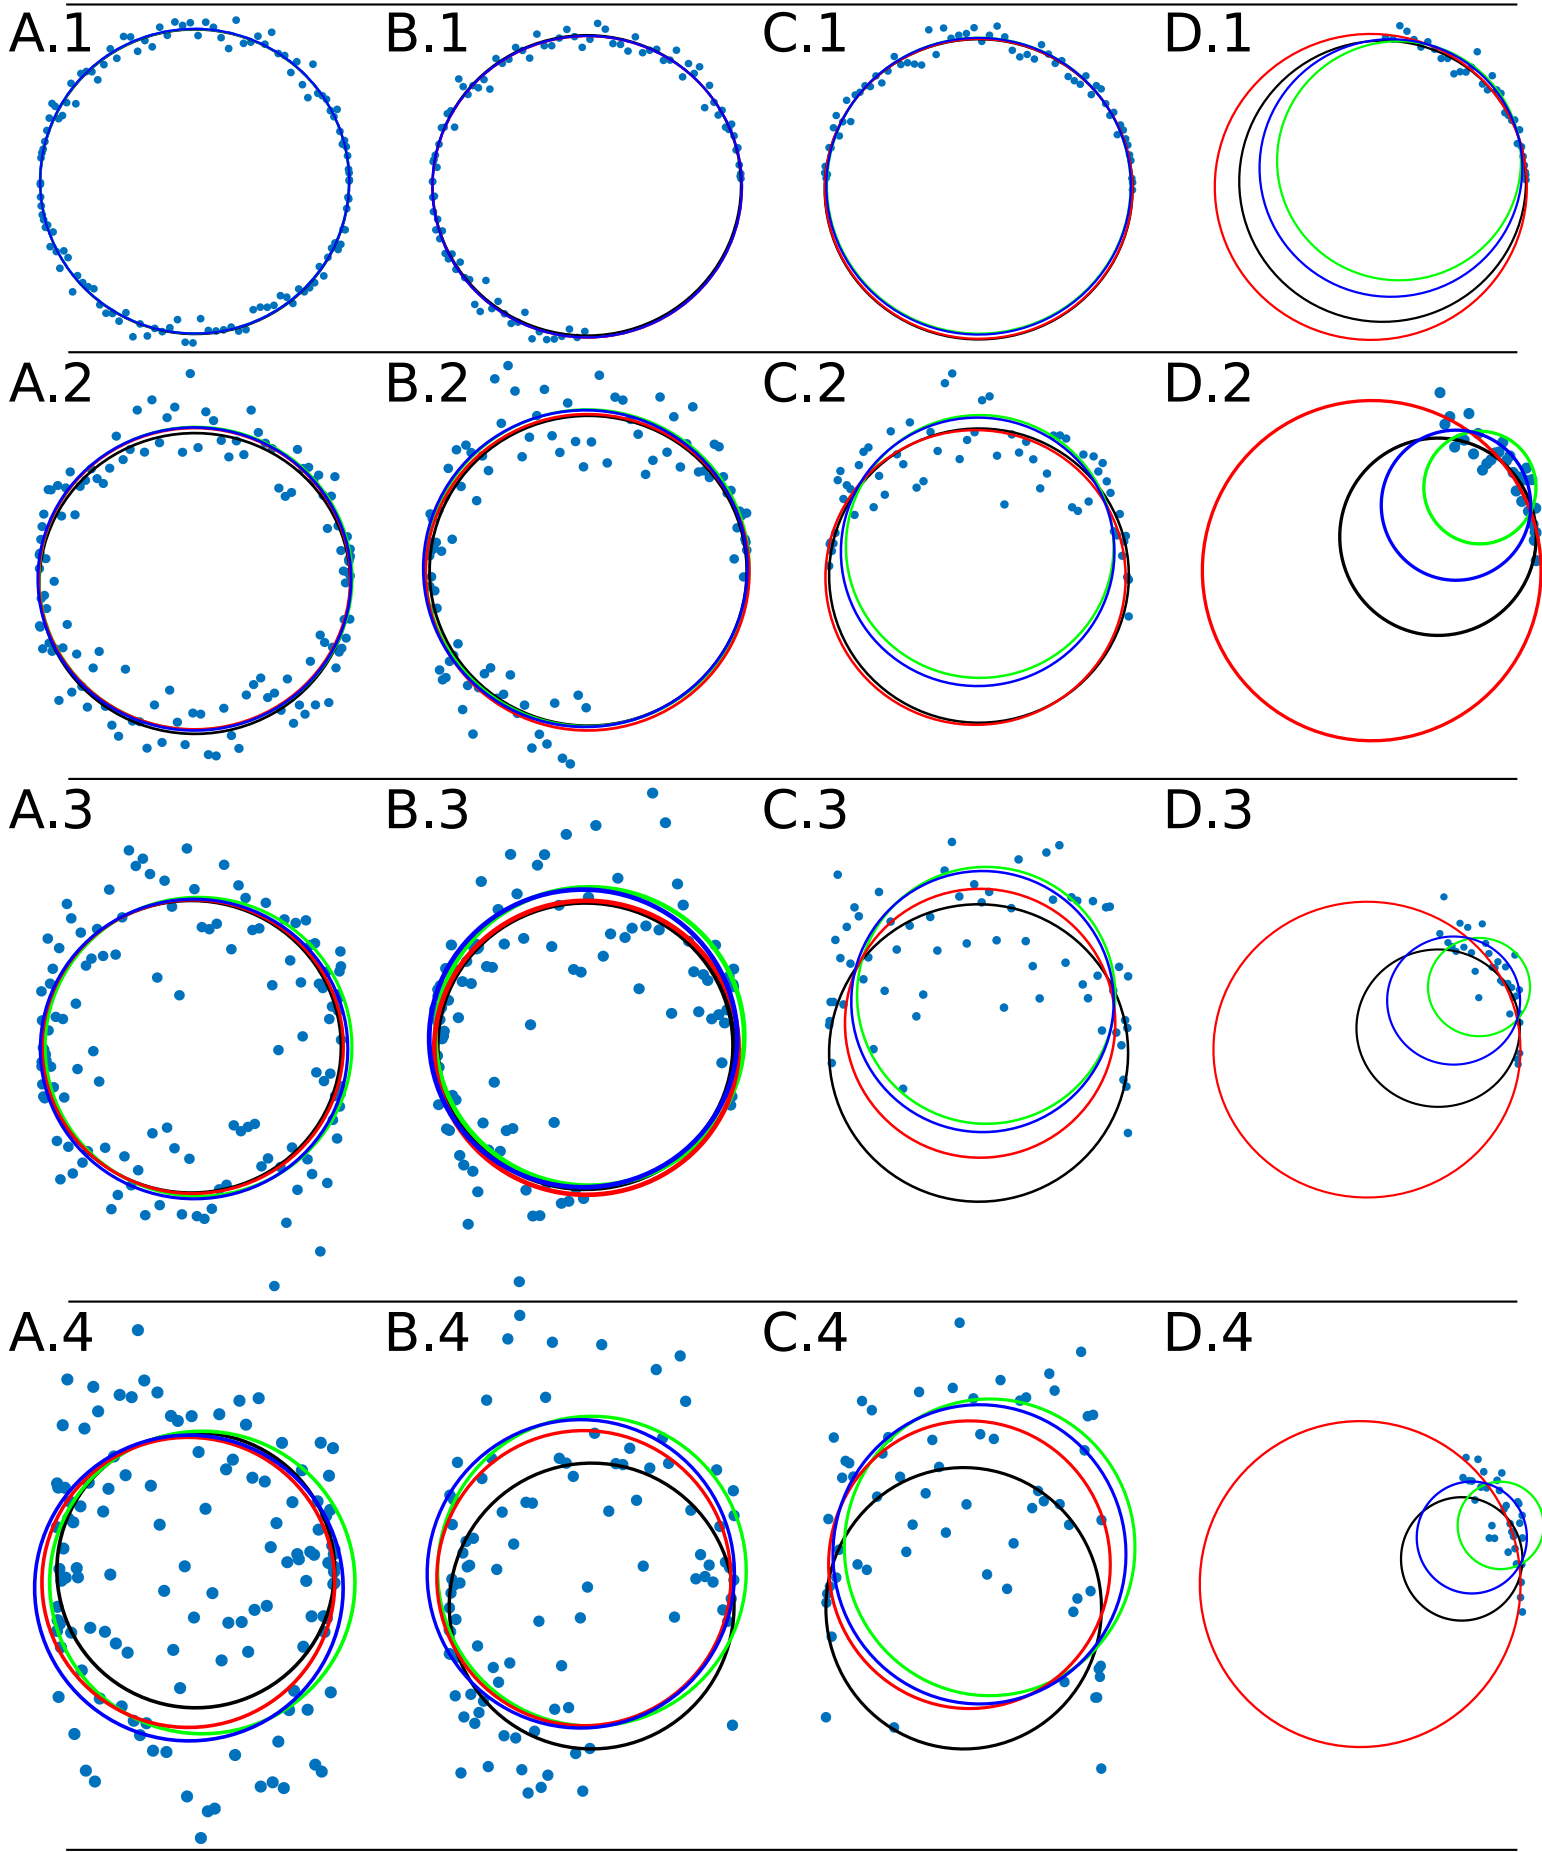

Supplement: supp [file elife-42906-supp-v1.zip]

A

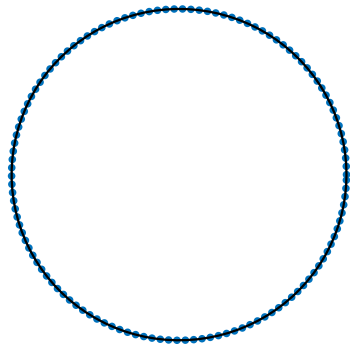

GT

B

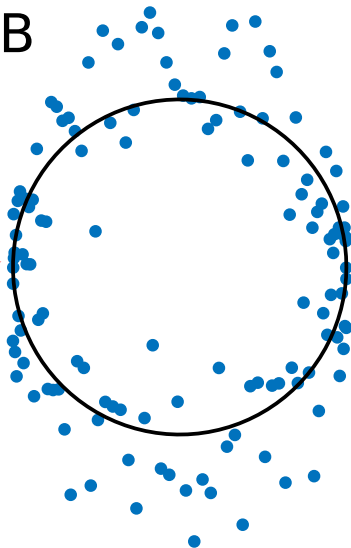

Gaussian Noise

C

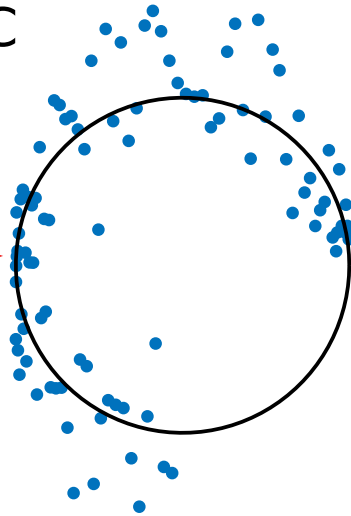

Partial Occlusion

Supplement: supp [file elife-42906-supp-v1.zip]

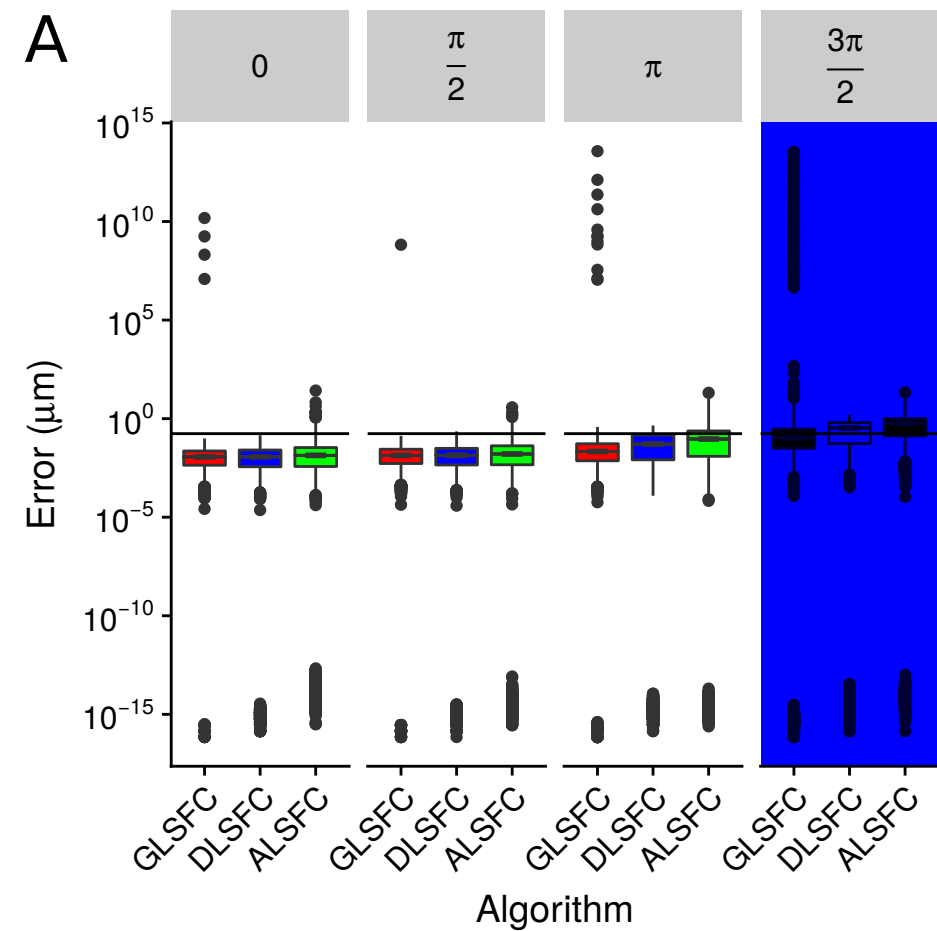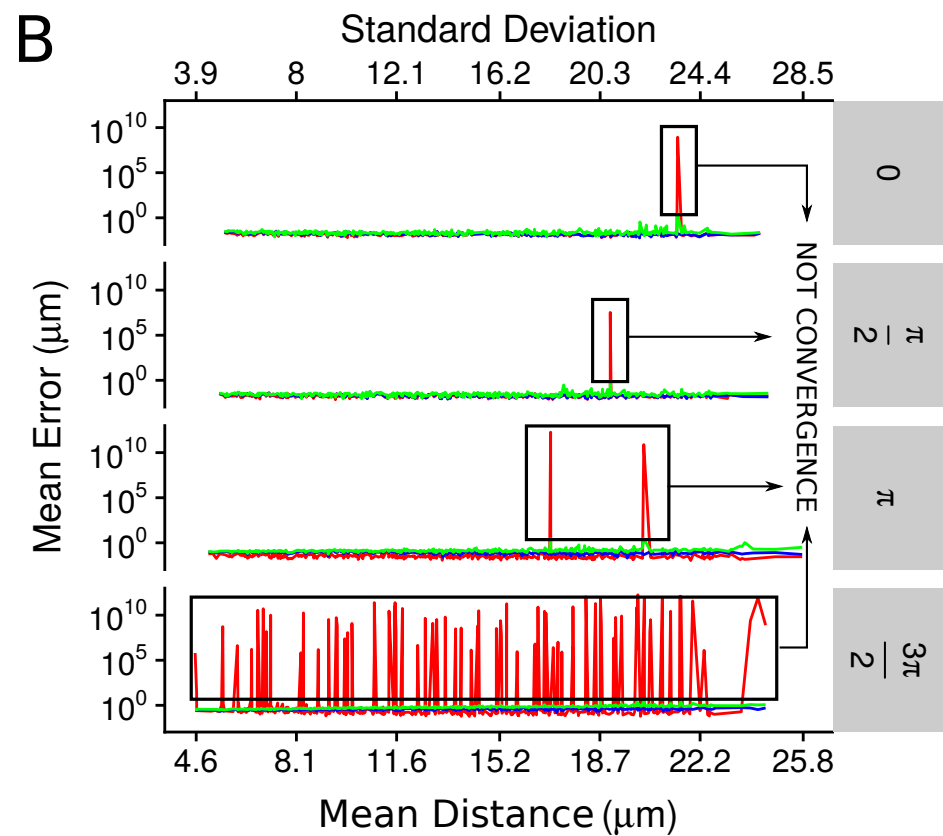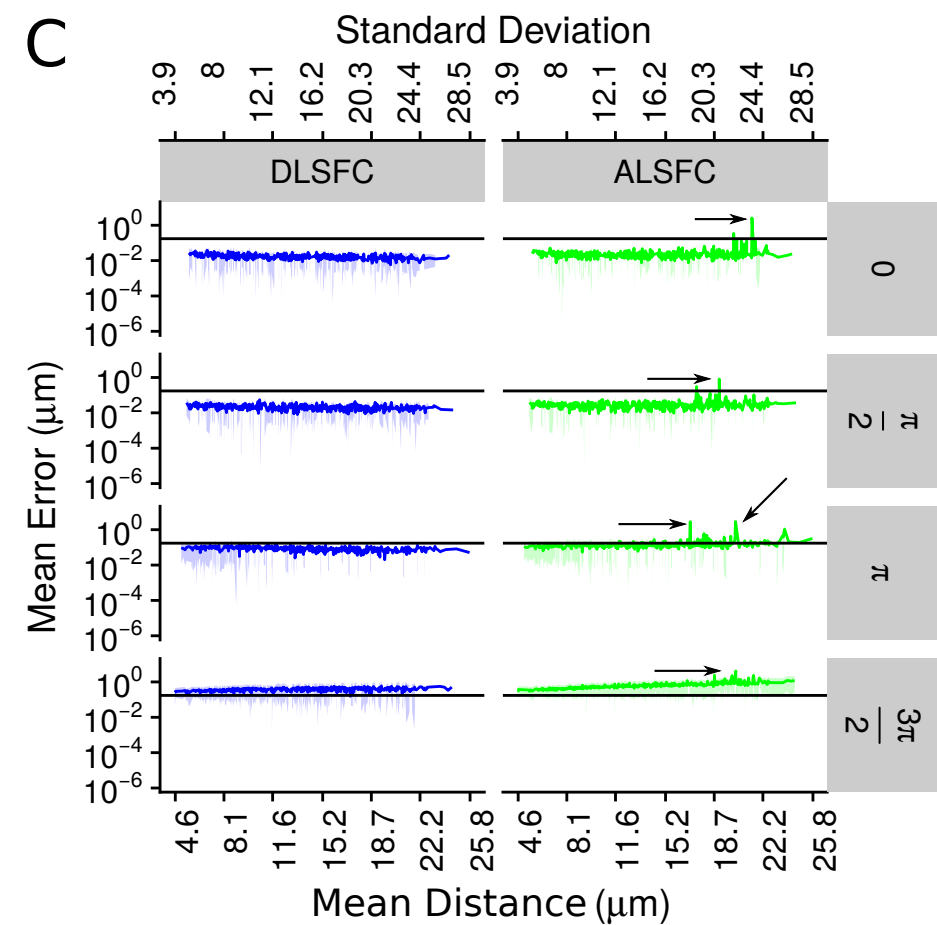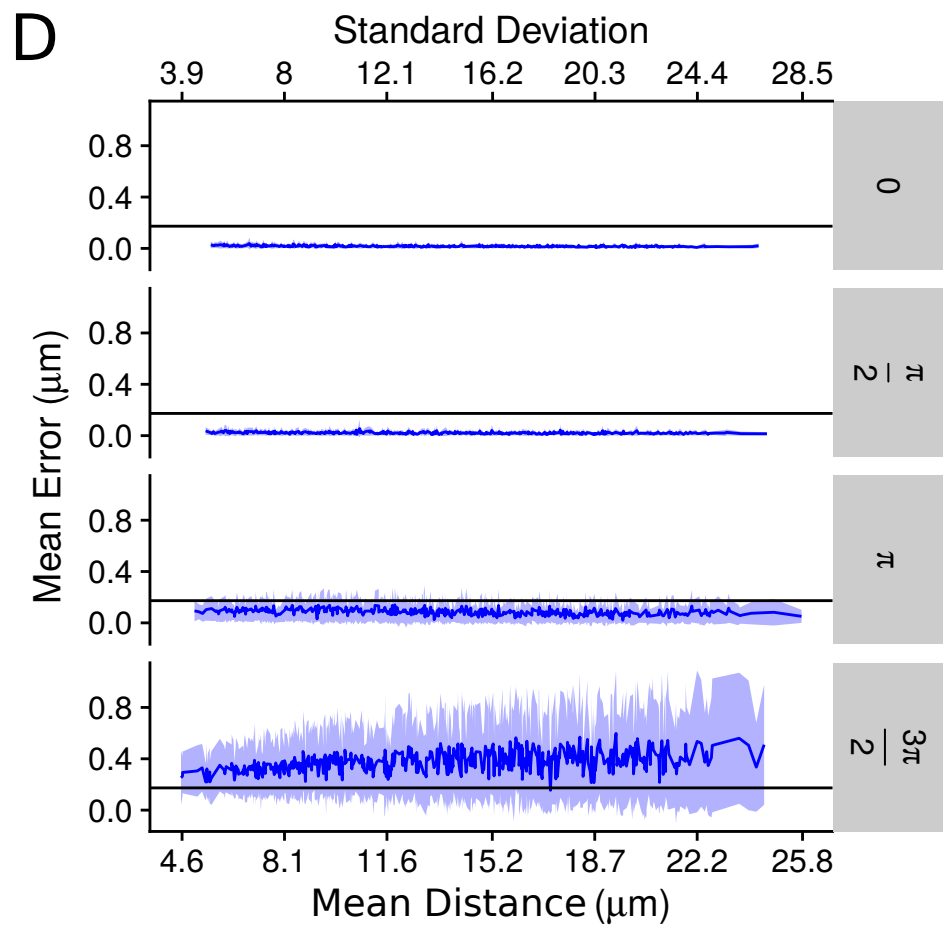

Supplement: supp [file elife-42906-supp-v1.zip]

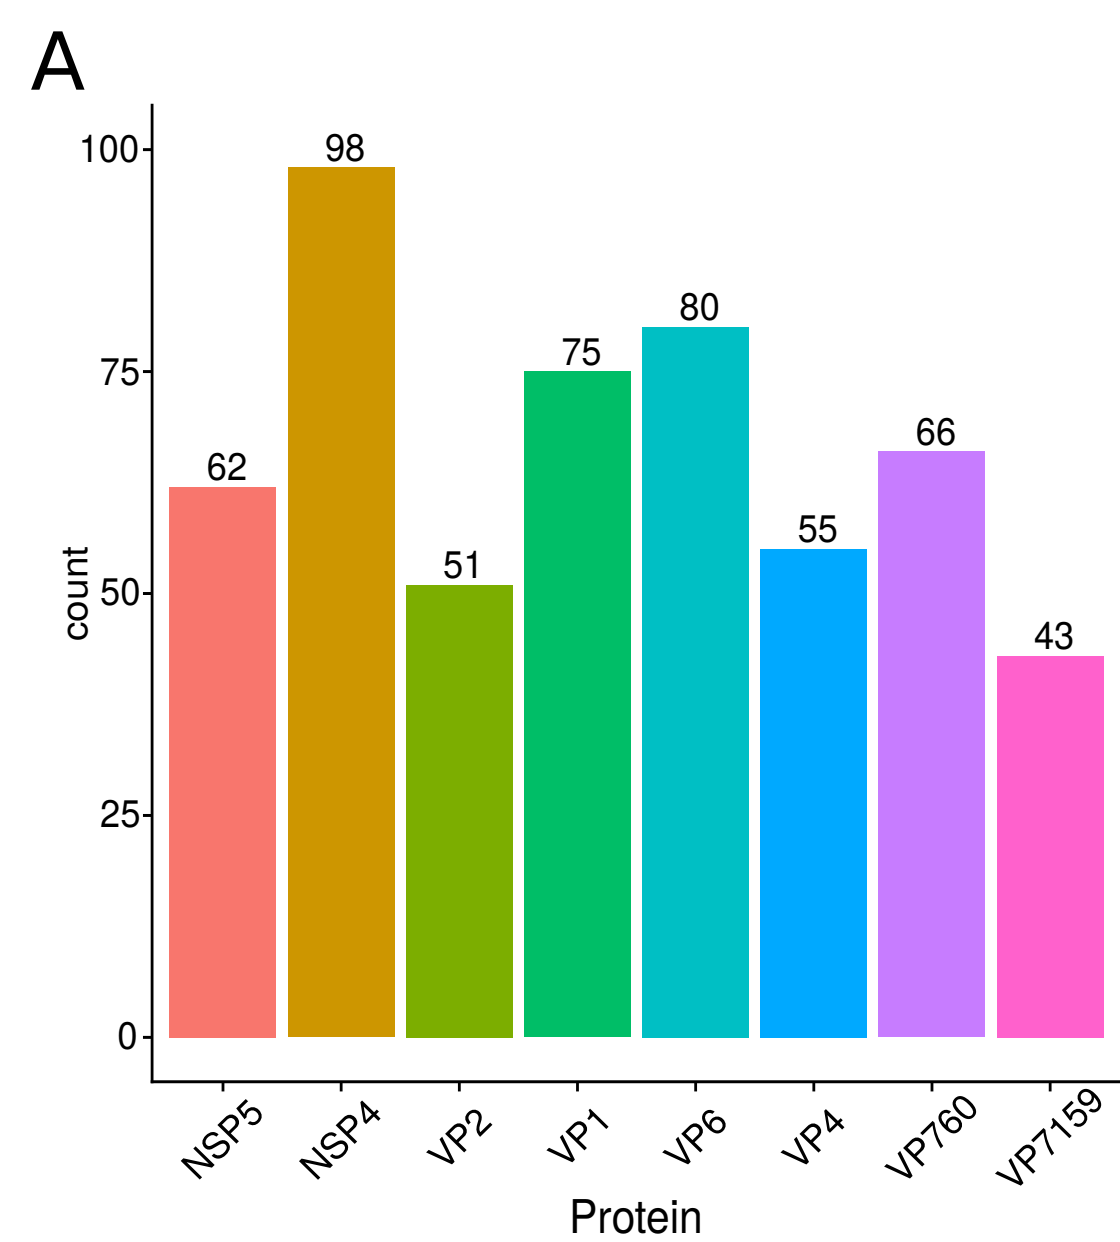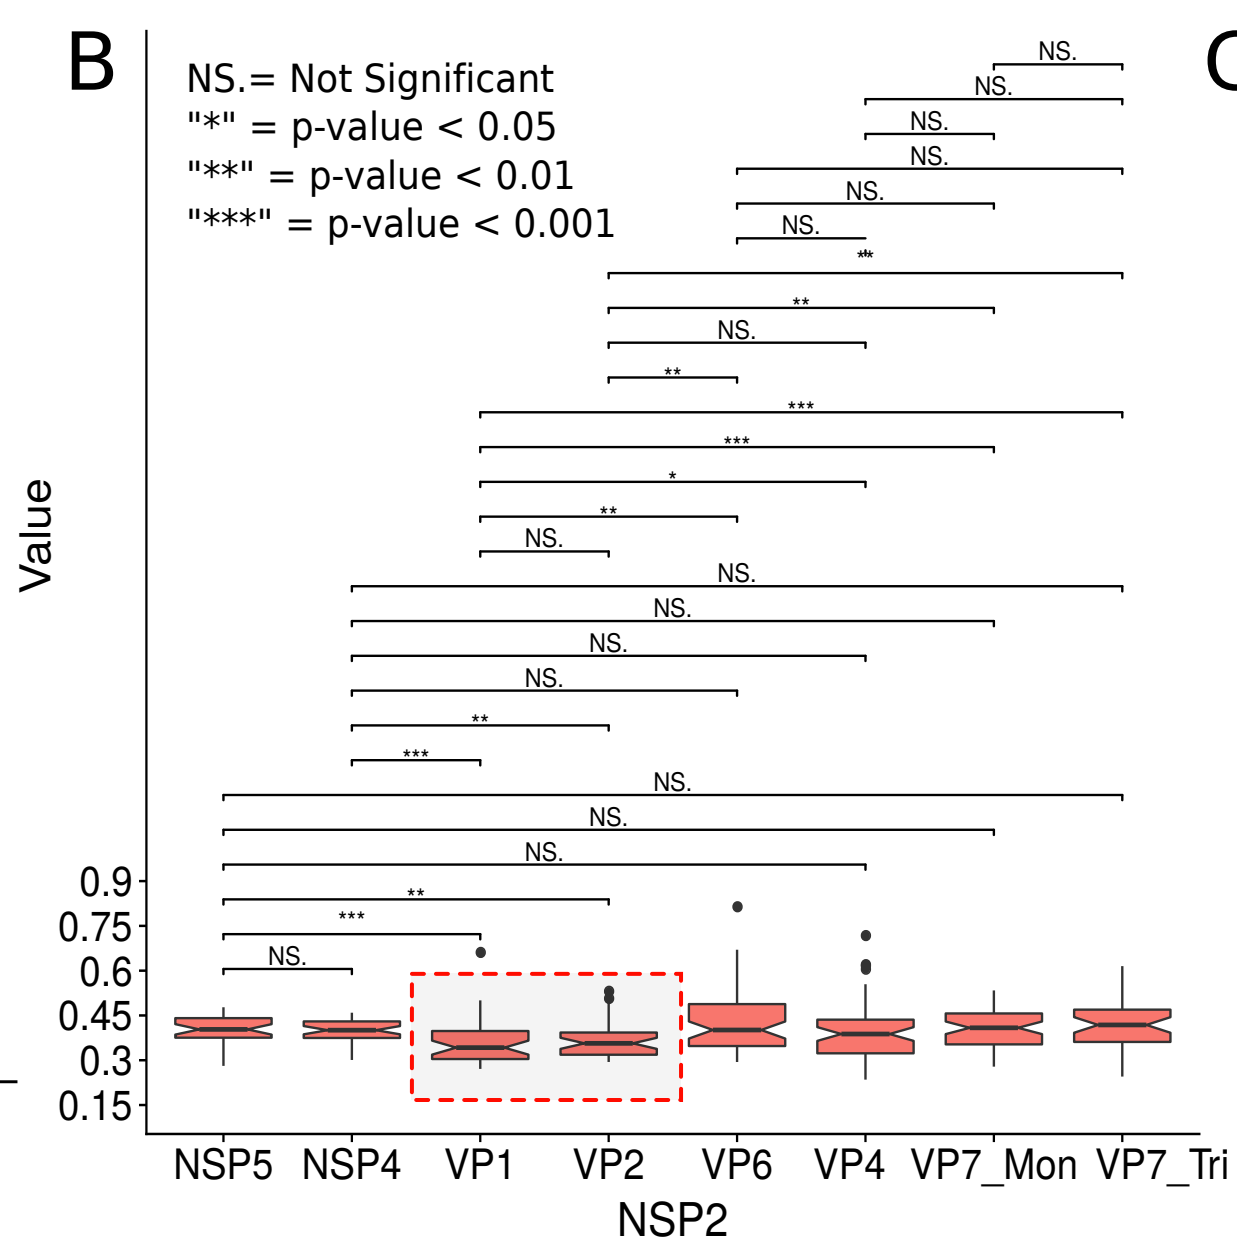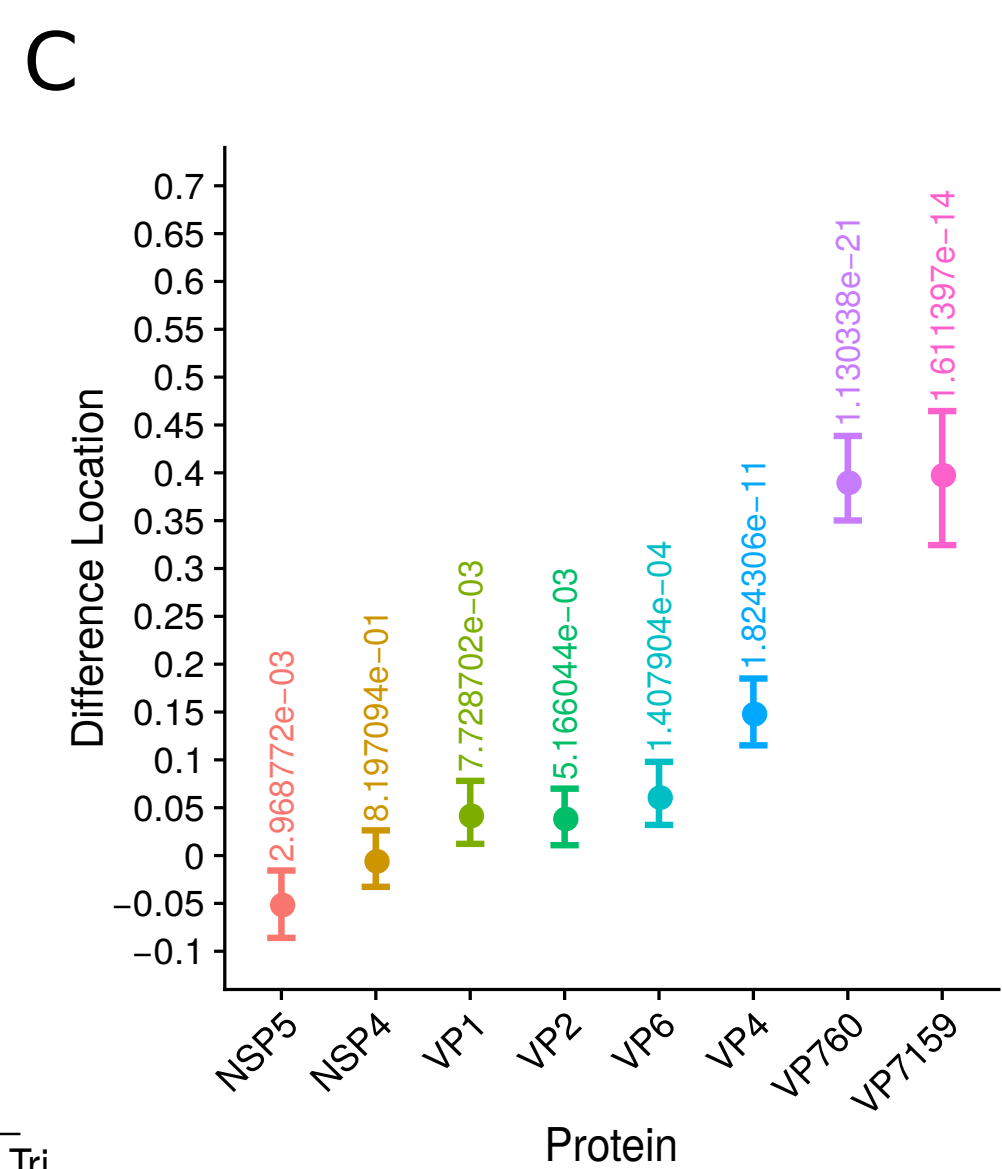

Supplement: supp [file elife-42906-supp-v1.zip]

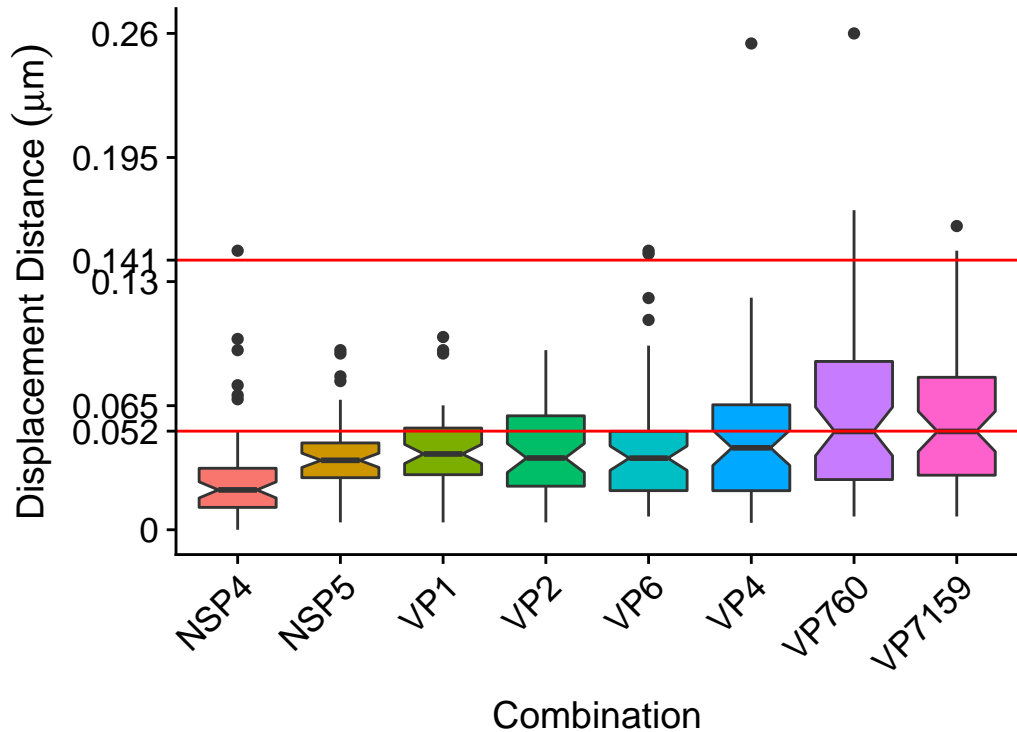

Supplement: supp [file elife-42906-supp-v1.zip]
